# Supplementary material
Source: HighWire-hosted journal article supplement (https://cmaj.ca/highwire/filestream/74666/field_highwire_adjunct_files/1/190385-res-10-at.pdf)
Supplement: 190385-res-10-at.pdf [file 190385-res-10-at.pdf]

# Appendix 10

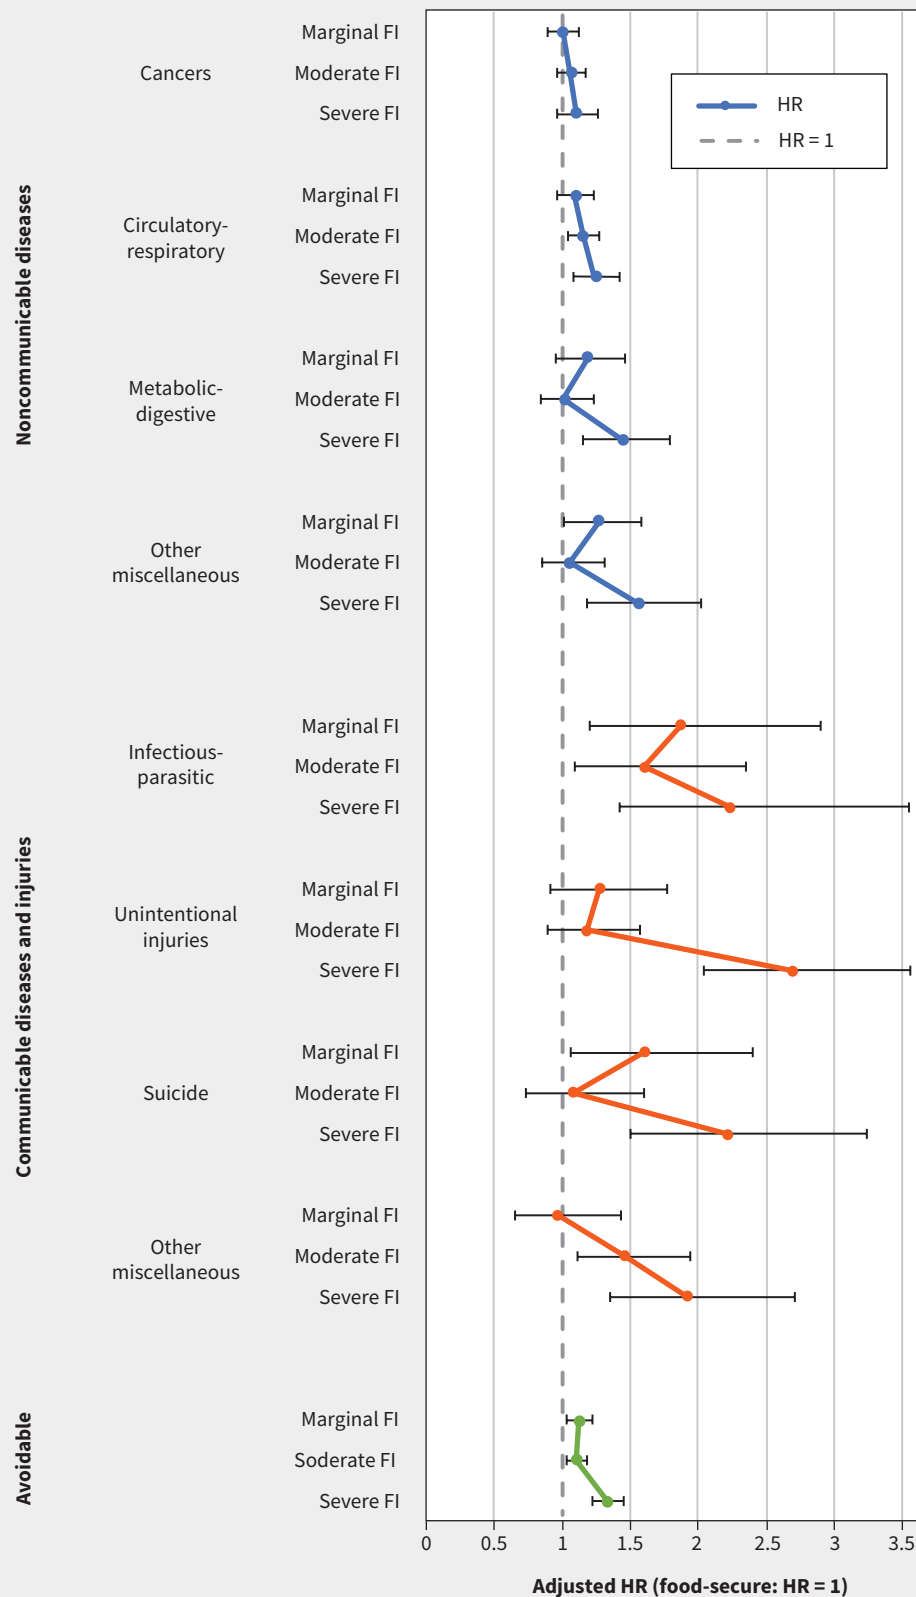

Fully adjusted hazard ratio (HR) of cause-specific mortality by food insecurity status among adults aged 18–82 years at interview. Note: Models were adjusted for household income, highest education in household, household type, housing tenure, acute care hospital admission in the past 2 years, number of self-reported chronic conditions, smoker status and past-year alcohol consumption history. Respondents’ sex, age at interview, history of admission to hospital and self-reported chronic conditions were set as strata. FI = food insecure.
